# Supplementary material for: Understanding the pH Dependence of Supersaturation State—A Case Study of Telmisartan
Source: MDPI journal article supplement (doi:10.3390/pharmaceutics14081635), 2022-08-05
Supplement: s1 [file s1]

---

## Supplementary Materials: Understanding the pH dependence of Supersaturation State—A Case Study of Telmisartan

Szabina Kádár, Dóra Csicsák, Petra Tózsér, Attila Farkas, Tamás Pála, Arash Mirzahosseini, Blanka Tóth, Gergő Tóth, Béla Fiser, Péter Horváth, János Madarász, Alex Avdeef, Krisztina Takács-Novák, Bálint Sinkó, Enikő Borbás and Gergely Völgyi

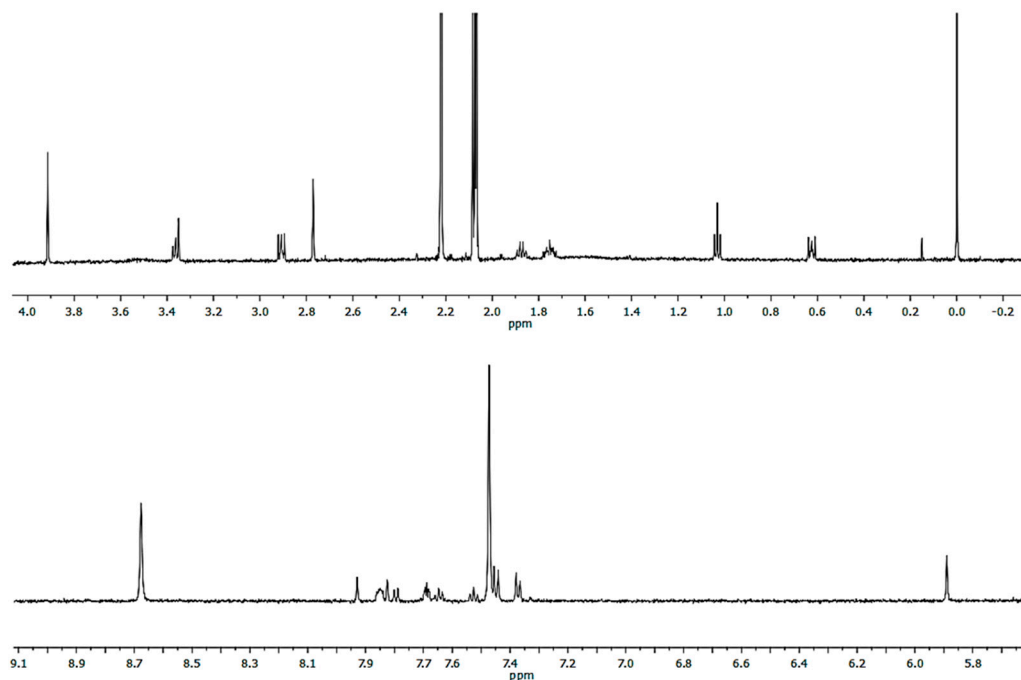

**Figure S1.** NMR spectrum of TEL at pH 1.75 (please note that for better illustration only the aliphatic and aromatic region of the spectrum is depicted).

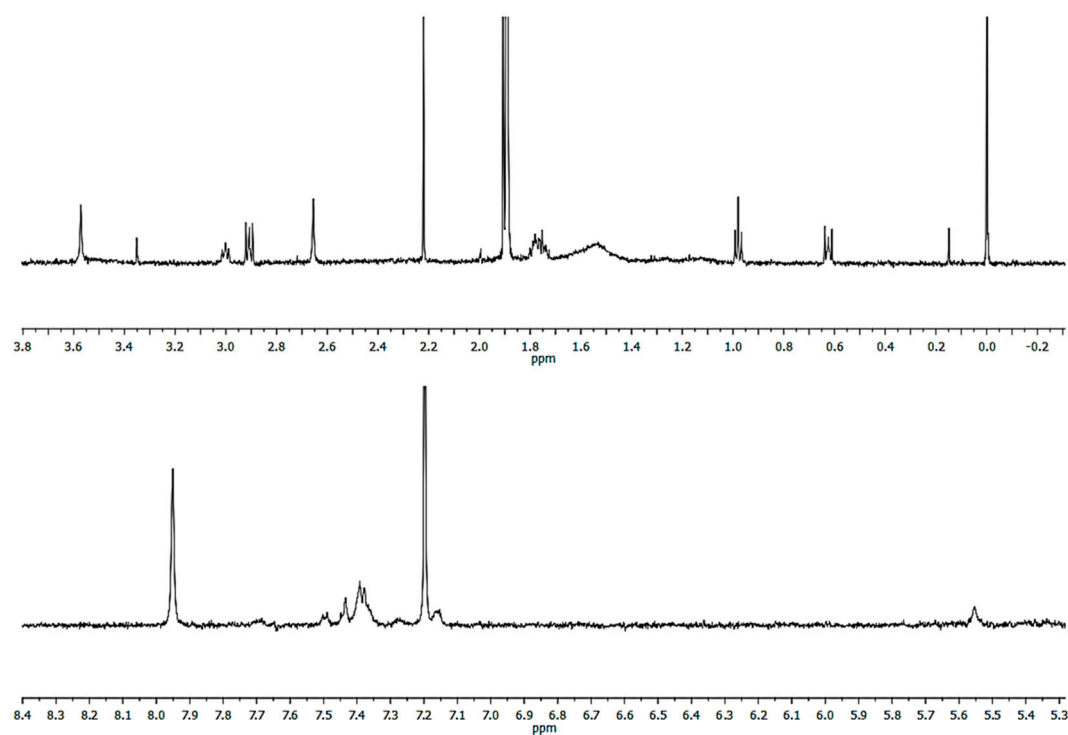

**Figure S2.** NMR spectrum of TEL at pH 7.75 (please note that for better illustration only the aliphatic and aromatic region of the spectrum is depicted).
